# Supplementary material for: Genetic Variation in Vitamin B-12 Content of Bovine Milk and Its Association with SNP along the Bovine Genome
Source: PLoS One. 2013 Apr 23;8(4):e62382. doi: 10.1371/journal.pone.0062382 (PMC3633873; doi:10.1371/journal.pone.0062382)
Supplement: Table S1 — SNP significantly associated with vitamin B-12 content in milk of 487 cows. All 68 SNP significantly associated with vitamin B-12 content in raw milk of 487 first-lactation Dutch Holstein Friesian cows, with for each SNP its −log10(P-value), genotype effects with standard errors (SE), minor allele frequency, additive and dominance SNP effects with SE and −log10(P-value)s, phenotypic variance explained, indication whether the SNP was added to the model to estimate the total phenotypic variance explained, and information on SNP position, sequence and proximity of genes. (XLSX) [file pone.0062382.s001.xlsx]

## Sheet: Supporting Table 1
Table S1: SNP significantly associated with vitamin B-12 content in milk of 487 cows (see footnotes at bottom)
				Genotype effects2									SNP effects4							Phenotypic	Total		Position				Gene(s) in which SNP is located or that are at close distance from SNP
	SNP name	-log10(Pvalue)1		AA	se	AB	se	BB	se		MAF3		additive	se	-log10(Pvalue)5	dominance	se	-log10(Pvalue)5		variance6	variance7	BTA8	BTAU4.6.1 (bp)	Rs-number	Sequence		In gene	5' side from SNP (within 100 Kbp)							3' side from SNP (within 100 Kbp)
1	ULGR_BTA-104613	3.3626		0	0	-0.1053	0.3903	-0.6551	0.3868		0.16		-0.3276	0.1934	1.04144	0.1482	0.1478	0.50112		3.27638	*	1	64073082	rs=41569326	GNAAGTGCTGCACCTAATGCGATACCATTTTACATATGTTAGTATCTGGGGACACTCCAC[A/G]CATATCACAGAAAAACAAACTGAATGAGCAATGTGATTTTTTTAAAGTCCTGGGTACTGG		no similarity
2	ULGR_BTA-23454	3.16605		0	0	1.201	0.3514	-	-		0.02		-	-	-	-	-	-		2.27196	*	3	121239380	rs=41665903	AGAACAATGAAGATTCAAATCCCACATTAGGTTTCCTGAAATGTTTACATGCCTGCGTCT[T/C]CATGCAGAGGTTTCTTCACTGCTGTTGGGACGGAAAGGGAACACAAAATGCATGTGACGG		no gene	no genes							no genes
3	BTB-02051812	3.21385		0	0	-1.351	0.3918	-	-		0.01		-	-	-	-	-	-		2.35074	*	4	79985862	rs=43155102	GCAGTAACACAAACCACTGTTTTAAATCACTTCTCAGCCAGTTACTCTTCTGGTTAACTT[A/G]AGAAAGCAAGTGAAACAAGCTCAGTCTGAGCCTTGTGAGGGAGACACGTGGTAGAACTTA		HECW1	LOC100335668							no genes
4	ULGR_MARC_5923_453	3.01721		0	0	0.6548	0.3251	1.031	0.3229		0.2		0.5157	0.1614	2.82688	0.09272	0.1287	0.326798		3.16471		4	117291077	rs=17871621	ATGGTGCTCGTGGATTACAGTATTGAGGACACCTACACCCAGGTACGGCGGTGTGCAGTG[A/G]TGAGGGGGTGCGGGGCTCCAGGCCCCAGGACCAGGACTGCTGCTAAGCCAGGCAGACGCC		SLC4A2	CDK5	ACCN3	LOC100847586	ABCB8	ATG9B	NOS3	KCNH2	FASTK	TMUB1	AGAP3	GBX1	ASB10
5	ARS-BFGL-NGS-14567	3.9871		0	0	1.593	0.3742	1.568	0.3702		0.18		0.784	0.1851	4.56041	0.5393	0.143	3.73508		3.67987	*	4	123173330	rs=109173000	AGAAGCCCACGCTCCTGAGTTTGCGGGTCCTGACCGCCCACAGCCGACGGACGATTTCCT[A/G]ACGGAATTCTCTCCGCGGCCCTGGAGACGAGGGAGCTTGGATAGGCCGCTTTGTGCGCGA		no gene	ESYT2							WDR60
6	ULGR_rs29024363	3.01721		0	0	0.1071	0.1457	0.7009	0.1989		0.42		0.3505	0.09944	3.33173	-0.1623	0.08426	1.26214		3.13969	*	5	11594833	rs=29024363	CAGTACTGTGAGATTCTTGTGAACCCACTGGAAAATCAGTCAGTCAGTGCCCCTGGAATA[T/C]AGGGATCAAGAAAAGGAATAGAGTGAGGTTAAGCTAAAGACATAGATAGGAGCCAAACTT		no gene	no genes							no genes
7	ULGR_BTA-95298	3.04261		0	0	0.504	0.2194	0.8284	0.2286		0.33		0.4142	0.1143	3.49231	0.05985	0.0962	0.2736		3.12704		5	105698453	rs=41597528	GCTGTGATTCTTTGGATACCCTCTCTAGTCCCACCAATTCATGGCATCCTAAGAAATTTA[T/C]ACCAACTCAGGACAGTAAAAAAAAAAAAAAAAAAGACACTGGGTTCTAACTTTGAGAGCC		no gene	CSDA							STYK1	LOC100847436	MAGOHB	KLRA1
8	ULGR_BTA-95299	3.04261		0	0	0.504	0.2194	0.8284	0.2286		0.33		0.4142	0.1143	3.49231	0.05985	0.0962	0.2736		3.12704	*	5	105698677	rs=41597529	TCTAGGAAGCATGTATTGTCCAACCTGTTCTAGAACTGATTTTCTTAGAGACACAACATT[A/C]AGTGGTATCTCCCAATCATACACAGATTCTAATTATCCTCTCAAGGCCACGGAACTGTAA		no gene	CSDA							STYK1	LOC100847436	MAGOHB	KLRA1
9	ULGR_BTA-95300	3.04261		0	0	0.504	0.2194	0.8284	0.2286		0.33		0.4142	0.1143	3.49231	0.05985	0.0962	0.2736		3.12704		5	105698760	rs=41597530	CAGATTCTAATTATCCTCTCAAGGCCACGGAACTGTAAATGCTATTGATAGCAAATGAGA[T/C]TGGTATACTGAAAATTCCAAAATATCATTGAAAGGAATGAAGCAAGAACANANTAAATGG		no gene	CSDA							STYK1	LOC100847436	MAGOHB	KLRA1
10	BFGL-NGS-113223	3.2184		0	0	1.24	0.3593	-	-		0.02		-	-	-	-	-	-		2.42191		7	68853087	no rs	CCTTAAAAGAGTAAGTCAGAAAGAGTGAGTTGAAGATAGTACATTGTTGGCTTTGAAGAT[A/G]GTGGAAGGGGCCTCAAGCCCAGGAACGTACGTGACCTCTGATCCTGGAAAAGGCAAGAAA		no gene	SGCD							no genes
11	ULGR_BTA-79855	3.99963		0	0	1.469	0.3604	1.546	0.3575		0.18		0.7728	0.1787	4.72942	0.464	0.1397	3.01757		3.93505	*	7	77315270	no rs	TTGTTCTCCAAAATTGTCTTTGGTTTTCCATAGACTGCATATTCCAAATTGCAATTATTT[A/G]CTGTTCTTGAATATATATATATTTTTTCTGTAAAATAACTGTTATTTTTATTGTTATTTT		no gene	no genes							no genes
12	ULGR_rs29009784	3.37942		0	0	0.1379	0.1389	0.8393	0.2134		0.34		0.4196	0.1067	4.01417	-0.1878	0.092	1.3799		3.57251	*	8	45325220	rs=29009784	CCAAGGCTGGCATGTGGCTGACTTTACAGAGCATATCTGGATGCTATAAATCACCATCTG[T/C]ACACATGTTACTTAGAATATCTGTACAGGGGGGAATGCAAGCATTATTACAATATTAGAA		no gene	no genes							no genes
13	BTB-00347427	3.02996		0	0	0.4793	0.1833	0.7662	0.2038		0.44		0.3831	0.1019	3.71939	0.06412	0.08726	0.334612		3.59763		8	52417575	rs=43554340	ATACATTAAAATTGCTATATGTTTCCACTTGCATATATTTTAGTTACATCAGTAGAAGAG[A/G]TCTCAGTTCTCTAGATTTATACTACTACAAAGAGGAGCAAGGAGGAGGGATATACTTTTA		no gene	no genes							no genes
14	ULGR_AAFC03001161_39305	3.10986		0	0	-0.5288	0.1401	-0.1745	0.2122		0.33		-0.08723	0.1061	0.387215	-0.2944	0.09531	2.67194		3.04201		8	54858831	no rs	TTACTGATCCTGCATTATGTTTAAAGTGAGGGGACATAATACCTTAAACTTACTTAGTCA[A/G]TGCTTTATAATTTTCAGAGCACTTCCTCATTCTGTTTATTCTCCACAGTCCCTGTAATGT		PRUNE2	LOC100335747							no genes
15	ULGR_BTA-120565	3.40463		0	0	-0.3039	0.1997	-0.7488	0.2112		0.34		-0.3744	0.1056	3.36579	0.04698	0.09151	0.214416		3.64589		10	50494548	rs=41622117	CCTTTAGAATTTGAAGGTAAACAGATTCCACCTTTGTAGTGGAAAAATAAAGCAGCCTGA[A/G]ATTTTATGGCTAAATGCATGTCAATTTGCAAAGAATTGTTTGAATGCAGATCCCCTGGTG		no gene	no genes							no genes
16	ULGR_BTA-120564	3.40463		0	0	-0.4449	0.1417	-0.7488	0.2112		0.34		-0.3744	0.1056	3.36579	-0.04698	0.09151	0.214416		3.64589	*	10	50494930	rs=41622116	ATTCTTCACCAAGTCCCAGGCCTCCTGCCTGGCTCTCTCCTTTGCTCCCCTCGCCCCTCA[T/C]TCTTGGTTCCACCTGGCTCTGACTTCCCGGCTTTATTTCCCATCCCGGTCTGATCTTGTC		no gene	no genes							no genes
17	ARS-BFGL-NGS-82941	3.2362		0	0	-0.5272	0.1435	-0.6219	0.2186		0.37		-0.3109	0.1093	2.33315	-0.1442	0.08928	0.971196		3.54051		10	52042078	rs=43626172	CACTGCTGGTTCACTTCGCTTAGAATATTCTGCTGGCTCTCTGCACGGCTGGCTTCTCTC[A/G]GACTTCAGCTCCTCAGGGAGGCCTTTCCTGCCTGTCTATACAGATTAAGTTGTACTGGTA		LIPC	no genes							LOC539389
18	ULGR_BTA-88378	3.30783		0	0	-0.5266	0.1345	-0.1994	0.2794		0.26		-0.09968	0.1397	0.322859	-0.2846	0.11	2.00035		3.14088		10	62176572	rs=41597632	GCCAGAACACTTTTCTATTTTAGTGGCTGAACTCCCTTTGTATAACCGTCCCCAAAGATC[T/C]GTCTTATGTCTGATTGCATTTTACTATGAATAAGGCTAGAGCTACACCCCAGAATTTTGA		OSBPL3	no genes							no genes
19	ULGR_BTA-88377	3.36249		0	0	0.3155	0.2787	-0.2155	0.2835		0.25		-0.1078	0.1418	0.349994	0.2822	0.1111	1.9426		3.19753	*	10	62176711	rs=41597631	CTTAATAACCTGGAAGCAGAAGCAAGTAGACCCAAGTCCTAGGAGAAAGACGGGGAGGGT[A/G]TGGAACCACAGGCAGTCCTGGATGCTCCGGCTCAGTTTCTGTGTTGTCCTCAAGTTCAAT		OSBPL3	no genes							no genes
20	BTB-01246946	3.20663		0	0	-0.4256	0.1522	-0.7335	0.1941		0.47		-0.3667	0.09705	3.75044	-0.03926	0.08505	0.189111		3.44443	*	10	73177478	rs=41862338	CATTGCCTGGTGCAGGCCAGTAACAACCCTGAGAGGCTGCAGCTGACAGAAACTACAGGC[A/G]GGGGCAGGCCTTCCAGTGGCCCAAGCCAGTTGACTAGCATCCAGTCATCACTTCTTTTCC		DAAM1	no genes							no genes
21	ULGR_BTA-82435	3.40884		0	0	-0.3821	0.1591	0.1994	0.1904		0.49		0.09969	0.09522	0.530475	-0.3212	0.08376	3.84695		3.15846	*	10	98915261	rs=41660375	AGGAAATATGGAGAATTGTTCATGGCATTGTTTTTATAAGTTAGGTCTAGAAGTCTTGAA[A/C]TAGTCAGCTCAGGCTGCCATAAAAAAATACCATATACTGCATGGCTTAAACTTCAAAAAT		no gene	no genes							no genes
22	ULGR_BTA-86589	3.22799		0	0	1.558	0.4187	1.613	0.4166		0.15		0.8064	0.2083	3.90946	0.5007	0.1585	2.77387		3.07469		11	22489734	rs=41592166	CAAAGGGTCGGAAATGACTGAAGCAACTTAGCACTTAGCACATCAGGACTGAATGACTGA[T/C]CAAATGAATAAAGAAGGAAGCACATACTGACTAATCCATCAGCTGTGACATACATTACAC		DHX57	GEMIN6	LOC521269	SRSF7					MORN2	ARHGEF33
23	ARS-BFGL-BAC-11039	3.66904		0	0	1.383	0.3582	1.485	0.3584		0.18		0.7423	0.1792	4.39082	0.4274	0.1382	2.67899		3.63955	*	11	22561119	rs=43669938	GTCAAAAAGAGTTGGACACGACTGAGTGACTAACACTTTAACTTTCTAGTTGTTATTTTA[T/C]GTTTTTACAGTTAAATTCTACATGCCACTTGATGTCATTTTCATTTACCTTCCAGTTACA		ARHGEF33	MORN2	DHX57						SOS1
24	ULGR_BTA-32279	3.73189		0	0	-0.9277	0.2425	-1.027	0.2476		0.29		-0.5133	0.1238	4.39744	-0.2763	0.1009	2.19136		3.544		13	not found9	no rs	AACAAAACAGATAAGCACAAAGGAGAAAAATAAAACAACAAAAAATTCTACCCTTATAGT[T/C]GCTATATGNCAATACAAATTAAAAAAAAAAAAACCTACTGTATAGCTCAGGGACCTCTAC		no similarity
25	ULGR_BTA-32298	3.07024		0	0	-0.8799	0.2622	-	-		0.03		-	-	-	-	-	-		2.21859		13	30933007	rs=41628255	TAGGAGTGACTGCCTCCCAGGACCAGAGAGTGAACGTGCAGACTTGAGGGAGCCTTTTCC[A/G]AAGTCTGTACTTGCATCTAAGGCACGTCAGAGTGAAAGACATTTCAGCACACCTATCAAA		RSU1	no genes							no genes
26	ULGR_BTA-32300	3.07024		0	0	-0.8799	0.2622	-	-		0.03		-	-	-	-	-	-		2.21859	*	13	30933355	rs=41628256	TTTATACATTGAAGAAATGGACATGCACGAAGAAAAAGGAAAAATACTAACGATCCCTGA[A/C]GTACATCTGAATAACAGTGCTAAACAACTTAAAAAGAAGAAAAGTTACACTCCTTTTAAA		no similarity
27	ULGR_BTA-32302	3.07024		0	0	-0.8799	0.2622	-	-		0.03		-	-	-	-	-	-		2.21859		13	30935972	rs=41628257	GCATTAAGAACTCACCAGCTCATCTCATTTCCCTTCGTGTCCCTGGTTGAGGTTCAAGGT[A/G]ACCTTCCTGTTCCCAGCACATCCTAAGAGGCCTTCCGAGAGTCTCGAGCAGCGACAGTCC		RSU1	no genes							no genes
28	ULGR_BTA-33992	3.79874		0	0	-0.1087	0.1358	0.7417	0.2094		0.35		0.3709	0.1047	3.36117	-0.3197	0.09123	3.29999		3.54715	*	13	79643587	rs=41577128	CCCACCCAGTAGCTTATTGGCCTGGCACCAGTTGCAGGCATGTTTCACCAAAGTGTCATG[T/C]AGGAACATAACTCCTCAACCCCCAGAGGCCCAAAAATTAAGGCAAGAGACTGCTCTCACC		no gene	BCAS4							ADNP	DPM1	MOCS3
29	ULGR_BTA-34869	3.25745		0	0	-0.5427	0.1534	-0.6572	0.1926		0.48		-0.3286	0.0963	3.15459	-0.1427	0.08295	1.06551		3.23093		14	2585267	rs=41567296	TAAACCCATAAGCGGGGAGAGGGGGTATGATATAACTAACACTTGTTGACCCCTCACCAC[A/G]TTCCAGGTGAAGGGAACATCCTCCAGCAACTGCACAAATGGGGGATTACTGTCATCTCAT		TRAPPC9	no genes							no genes
30	ULGR_BTC-004294	3.01986		0	0	-0.7769	0.2337	-	-		0.05		-	-	-	-	-	-		2.46356		14	2904264	no rs	ACGAGTCGTCACGGTCTCCTACCCACGGAAGCAGGGACACTGCCGGTGGGCCCCGGGAAG[T/G]ACTTAAAGGAACAGCAAGAGCCAACAGGCAGATCCCCACCAAGCTCCACTGTGCCAAAGA		KCNK9	TRAPPC9							no genes
31	ULGR_BTC-068263	3.22378		0	0	0.5485	0.1915	0.8287	0.2134		0.39		0.4143	0.1067	3.9273	0.08945	0.0886	0.504411		3.51853		14	2992234	no rs	GTCCATAGCAGGGATCTGATGCCCTGGTGAGCGGTCAGTTCCCACTGCCTCTCTGTCCCT[T/C]TCTGCTTTCTGTCCTTGGCCCCATTTCACAGACAGGGAAATGGAGGTGTCTTTCTCGGAT		KCNK9	no genes							no genes
32	ULGR_BTC-068231	3.22378		0	0	0.5485	0.1915	0.8287	0.2134		0.39		0.4143	0.1067	3.9273	0.08945	0.0886	0.504411		3.51853		14	3006944	no rs	GCTGGCAAGTTCTATAGCATGGTCTTCTCAGTTCCAGTAGCGTACAGCAACCCACCTGCT[A/G]TGGCTCAGTTACCTCTTATTTTGATCAAGAAAATATGTCCACGTGGGCTCCTGCCTCTGA		no gene	KCNK9							no genes
33	ULGR_BTC-068225	3.22378		0	0	0.5485	0.1915	0.8287	0.2134		0.39		0.4143	0.1067	3.9273	0.08945	0.0886	0.504411		3.51853		14	3013664	no rs	CTCTGCACCAGCCCTCCGCCCCACCGTCCCGAACATCGAGCATCAGCTCAGACAGCAACG[T/C]AGCAGGCACACGTAAGGGCCAGAAGCAGCCTCCCCACCCCCACCCCCGGGTGAGGCCAGG		no gene	KCNK9							no genes
34	ULGR_BTC-068223	3.26166		0	0	0.2117	0.1463	0.8311	0.2143		0.38		0.4156	0.1071	3.92061	-0.1359	0.08926	0.891489		3.47822		14	3016578	no rs	AACCCAAACAGCTCGAGGATGTAAGACTTTCTCACTGGGCCCACCTGCAGGGTTGGACAC[A/G]GTGGGGGCGTGGGGAGTGGGGAGCTCTGGGTCAGCCTCCCAGCTCGGCGCCCACAGTCTT		no gene	KCNK9							no genes
35	ULGR_BTC-068221	3.26166		0	0	0.2117	0.1463	0.8311	0.2143		0.38		0.4156	0.1071	3.92061	-0.1359	0.08926	0.891489		3.47822		14	3018783	no rs	CAGGAGACATGGCCACATAATCCTGGAGATGATCAATCACAACTCTCATGTCCTAATCAC[T/G]CATATACTAAGCAATTGATCTCCTTCCCCGGACAACCGAAGTTAACTTTTCCAAGATCAG		no gene	KCNK9							no genes
36	ULGR_BTC-068202	3.40463		0	0	0.5166	0.1708	0.7809	0.1971		0.45		0.3905	0.09853	4.06754	0.08411	0.0849	0.491199		3.49633		14	3035731	no rs	AGGTNGGGCCATTGTACCCAGAGTTCTGCAGGTAAGAATTTTGGATTTTATCGTAAGGAC[T/C]GTGGCTGCTGCTGCTGCTGCTAAGTCGCTTCAGTCGTGTCCGACTCTTAGCGACCCCATG		no gene	KCNK9							no genes
37	ULGR_BTC-067934	3.17274		0	0	0.5827	0.1644	0.5873	0.1782		0.45		0.2937	0.08909	2.97601	0.1927	0.08906	1.50839		3.18796		14	3082568	no rs	GGAACATGTTCACCCTGTTTTTGGAACACTTGGGGACAAAGTGTAGGGAACTCTCTGAAC[A/G]TCTAGAACTACCTGACCACATGAGGCTTGACTGCTAGTGAATGCTTGTGTGTTTTCAGAA		no gene	KCNK9							no genes
38	ULGR_BTC-056317	3.04252		0	0	-0.4308	0.1442	-0.7174	0.2058		0.43		-0.3587	0.1029	3.2705	-0.0481	0.08577	0.238115		3.12197		14	4700914	rs=42308933	TTTATTAATCAAATAACACTTGGTCANTTCTCTATAGCTTACCCATGTTCTCAGAACCAT[T/C]ATCTCATGCACACAGACAATTTGGATCGGCTCCCTTGGTGCTGCAGTCACTAAGTCCTCT		no gene	no genes							no genes
39	ULGR_BTA-87708	3.09742		0	0	-0.5505	0.1775	-0.7325	0.1953		0.43		-0.3663	0.09764	3.7037	-0.1228	0.0857	0.815699		3.13505		14	5778688	rs=41661910	CTCCTATTGACACCTTCTGATGGAGAAAAGGCATAGTCAACCTACCGTGTTTTCTTGCTT[T/C]TTATTAATGCTGTAAGTTGTATTCATAAATGAAGAAATTTTTAGAGTCTTCCCCCTTTGC		KHDRBS3	no genes							no genes
40	ULGR_BTC-048051	3.14367		0	0	-0.5498	0.1775	-0.7406	0.1956		0.43		-0.3703	0.09779	3.76409	-0.1197	0.08581	0.787176		3.19315		14	5794477	no rs	GGGAACATAAAACTGCCGGACACTGAGGGGAAAGAGTCTTGTCTGCTGTTTACTGTGTGC[A/G]AGTCACTCCAGGTGTGCCCAGACCTTCACGGGTACAAACACCATGCACGAGGCTTCCTGG		KHDRBS3	no genes							no genes
41	ULGR_BTC-048044	3.14367		0	0	-0.5498	0.1775	-0.7406	0.1956		0.43		-0.3703	0.09779	3.76409	-0.1197	0.08581	0.787176		3.19315		14	5808020	no rs	AAGTCAGTTGCCTCTGAGGCAGGTTTCAGGGCACCCAGGATGCTGCTTCCTGTGCCTGAT[A/G]AGGACCAGGAAGGCTTCAAGACTGAAGAATAAACAGTAACAAGAACTGGTAGGGACAGAA		KHDRBS3	no genes							no genes
42	ULGR_BTC-006808	3.73189		0	0	-0.6521	0.2262	-0.9725	0.2374		0.33		-0.4862	0.1187	4.3069	-0.1105	0.09682	0.593823		3.97001		14	6362988	no rs	GCCACTGCTGTGGGAGAGGAGTGCCAGGGATGAGGTTTGTGATATTACCTACCCAGGAAC[A/G]CAGCTGGGTGGAGGGTCTCGCCATGTCTGGTCTGCCCTGGCCGAGGACAGGTTGTGCAAG		no gene	no genes							no genes
43	ULGR_BTC-052222	3.97858		0	0	0.4328	0.1457	0.8137	0.1937		0.44		0.4068	0.09683	4.49865	0.01733	0.08584	0.0749117		3.97458	*	14	7093372	no rs	TCCCACCAGCCATTCCTAAATCTTCCTTGAACCCCTGTGCATTCAGATTTTACACCTGAT[T/C]CAGACTCTCTCTCTCATGCCACCCCCCCCATTCCCAAATCTCCTTTAAGCTCCCAAGCCA		no gene	no genes							no genes
44	ULGR_AAFC03124342_2767	3.37498		0	0	-0.1501	0.1412	-0.7695	0.1966		0.39		-0.3847	0.09828	3.98276	0.1564	0.08856	1.10801		3.35819		14	7935430	no rs	AGGTTTAAGAGAACTAGAATGAGAAATGCAAAGAGAATCCAAAGTATTGTATAGTAAAAC[A/G]AAGATTCCTTTCTAAGTGTTTGTAAGCAAGCATGTATGTTAGGAGTGGTAAGGAGTATGA		no gene	LOC100847837	TG						PHF20L1	TMEM71
45	ULGR_BTC-007692	3.39191		0	0	-0.1524	0.141	-0.7713	0.1964		0.39		-0.3856	0.0982	4.00515	0.1555	0.08848	1.10008		3.36711		14	7961670	no rs	AGATATTCGCTGTTTTTCTACCAAAAATGAACGCCTTGGATTTTCAGGGAACAGAAAGCT[A/G]TTTGGTTCCCAGACAGTGACCTTTCATATTCCAGAAAACTGCAGCCTGCAGACCTGTTAG		PHF20L1	LOC100847837	TG						TMEM71	LRRC6
46	ULGR_BTC-007691	3.37498		0	0	-0.1501	0.1412	-0.7695	0.1966		0.39		-0.3847	0.09828	3.98276	0.1564	0.08856	1.10801		3.35819		14	7963899	no rs	CGGAGCTATAGTATCCACATAATTGAAATCACCCTTTTGATCAGATATGGGGATAGGAAA[A/G]TAATGGGTGATACATTTTTAACTCTGCCTTCTCCAGGGTATGCAGATAAACTACATACTT		PHF20L1	LOC100847837	TG						TMEM71	LRRC6
47	ULGR_BTC-007685	3.37498		0	0	-0.1501	0.1412	-0.7695	0.1966		0.39		-0.3847	0.09828	3.98276	0.1564	0.08856	1.10801		3.35819		14	7971998	no rs	ATAATTTGCTTTCTAATAAGACATTTGGGGACATTGTTTAAAATATGGGGAAGTTACATA[T/C]TGGGTGTCTTCCAGGCAGGAGCAAAAATGTGGTCACTCCAGGCCAGTGGGTTCCTGAGGT		PHF20L1	LOC100847837	TG						TMEM71	LRRC6
48	ULGR_BTC-007664	3.39191		0	0	-0.1524	0.141	-0.7713	0.1964		0.39		-0.3856	0.0982	4.00515	0.1555	0.08848	1.10008		3.36711		14	7986449	no rs	TGAGCATAGAGATTGTGTTGTAAGCATTTTGATTTGGTCAGAACCGATGGCATGAGTGAA[T/C]GCAGGCACAGAGGAGATTCAGATACTGAGGAGGTAGAGCAGCAGGAGTTTAAATCGAGTC		PHF20L1	LOC100847837	TG						TMEM71	LRRC6
49	ULGR_BTC-007633	3.58085		0	0	-0.6634	0.1737	-0.6914	0.1868		0.42		-0.3457	0.09341	3.62054	-0.2118	0.08595	1.85069		3.47736		14	8005833	no rs	TAGAGGAGGAAGATAGAGAGAGACTGATTCGTTAGTGAAAGGCCTGTAATAAAGTCTTAA[T/C]AAAAGCTTGCATTCTTGGCAGCGAGAACAGTGCCTTACTCATCTCCATGATCTCCAGCAG		no gene	PHF20L1	LOC100847837						TMEM71	LRRC6
50	ULGR_BTC-007631	3.3117		0	0	-0.1357	0.1414	-0.7588	0.1966		0.39		-0.3794	0.09832	3.88668	0.1625	0.08861	1.17116		3.30026		14	8007765	no rs	CCAAAGACAGAGGGTGGGGGTTTGGGGGTAGGAAGGGTGAGTAACCTTCCACTGGCTGGA[T/C]CCAGCCCACAGGTCACCCTTTGGTCACATTCTGTCCATGACCTCCTCCAATAACCACACG		no gene	PHF20L1	LOC100847837						TMEM71	LRRC6
51	ULGR_BTC-007532	3.38782		0	0	-0.6298	0.1853	-0.762	0.1955		0.39		-0.381	0.09776	3.95405	-0.1658	0.08832	1.21554		3.35114		14	8046705	no rs	AAATTCAAATATGCAAAAGAGAAAAGGCAACCCGGGATTCCTCAACCCAAAGACAGCCAC[T/C]GCCAACATCTTGGTGTTCAGCCAAGAAAACTGTCTTGATGGCAAGGTTGATGAGACATGG		TMEM71	PHF20L1							LRRC6
52	ULGR_BTC-007511	3.48025		0	0	-0.6097	0.1853	-0.7878	0.1967		0.39		-0.3939	0.09836	4.14304	-0.1439	0.08765	0.995642		3.45273		14	8076476	no rs	GACTTTTCAAATTAACATTTTTACCTCAGTTTTATATTTGTTATTCTTGTTGGAAAAAGT[T/C]AGACGATAATAAGATACATAAATTCAAAAGTGGAAGTCGCTTTGGCCCCTTCCTAACCCA		LRRC6	TMEM71	PHF20L1						no genes
53	ULGR_BTC-007506	3.40884		0	0	-0.6342	0.1806	-0.7376	0.1924		0.4		-0.3688	0.09618	3.84471	-0.177	0.08751	1.35955		3.35197		14	8079800	no rs	TATCAATAAAGACATAAATATTCGTTATACATTTTTAATGTTCATCCTCAAAACCTACAG[T/C]GTCATCACTAAGAAAGTCCCCAGACCATCATCAGTGCTGGAGCTGAGATGGTTGTTTCCA		LRRC6	TMEM71	PHF20L1						no genes
54	ULGR_BTC-057370	3.13514		0	0	-0.6085	0.176	-0.6776	0.1894		0.42		-0.3388	0.09469	3.41763	-0.1798	0.08684	1.4103		3.04511		14	8843612	no rs	CAGAGACTCAACTAGGTAGAGGAAACACAAAAAAGTTAACACAATGCATATATGTAAGAA[T/G]AATAATATACATATTATTCATTTGGGGAGTATATATCCATATGGTTAGTTGATGGAATAT		no gene	no genes							no genes
55	ULGR_BTC-063444	3.66065		0	0	-0.6973	0.1816	-0.7398	0.1933		0.4		-0.3699	0.09666	3.8313	-0.2183	0.08771	1.8798		3.57664		14	8938345	no rs	CGACTGAAGTGACTTAGCAGCAGCAGCANTACATTCTGCAGTCAAAGCAGCAGGATTTTA[T/G]ACCTTGTTTTATGTGTGTTTCTTGTTCAGAGAGATTTCATGTAATGTATGTGTTGGTCCA		no gene	no genes							no genes
56	ULGR_BTC-059893	3.59317		0	0	-0.3652	0.1358	-0.8299	0.215		0.33		-0.415	0.1075	3.88679	0.03319	0.09311	0.143517		3.53261		14	11100583	no rs	CAGTTGTCTACTTTATACATATTATCAATAGCNTATATATGTCAGTCTCACTCTCCTATT[T/G]CATCCCACCCTCCCCTTCCCGCCGCTTGGTTTCCATACTGGAAACACATTTTTAATGTTG		no gene	no genes							no genes
57	ULGR_BTA-35943	3.45085		0	0	0.6172	0.1734	0.7437	0.1949		0.45		0.3719	0.09745	3.81342	0.1635	0.08467	1.26731		3.5692		14	11958023	rs=41627765	GTCAGCTAAACTGATGTAAGTGCCACACATCACCAGTAACTCCATCACGGTATGTCTCTT[T/C]GTGCCTCTGACCATGTCCCCACACACCACCTGCTCCCTCATGGGACCTCCCAGCTTGGGC		no gene	LOC100847895							LOC100851899
58	ULGR_BTA-21924	3.08899		0	0	0.9454	0.2489	0.8271	0.2514		0.28		0.4135	0.1257	2.96717	0.3546	0.1038	3.16142		2.85655	*	17	51683647	no rs	TAACTGACATAAATATTTCTCATTTTTCCAGTCTGCAAGAATTGCTTAGTGCCTTTNTGT[T/C]TTGGTTCCAGGCCAGAGTGAGGAAGAGTGATAATCTTCGTAAAAACAACCTGAACAAAAA		no gene	no genes							no genes
59	ULGR_BTA-21923	3.08899		0	0	0.9454	0.2489	0.8271	0.2514		0.28		0.4135	0.1257	2.96717	0.3546	0.1038	3.16142		2.85655		17	51683651	no rs	AATATAACTGACATAAATATTTCTCATTTTTCCAGTCTGCAAGAATTGCTTAGTGCCTTT[T/G]TGTNTTGGTTCCAGGCCAGAGTGAGGAAGAGTGATAATCTTCGTAAAAACAACCTGAACA		no gene	no genes							no genes
60	ULGR_BTA-53394	3.11849		0	0	-0.5589	0.1853	-0.1211	0.2108		0.4		-0.06054	0.1054	0.247237	-0.3323	0.08724	3.80224		2.88406	*	21	9616650	rs=41581401	GAAGATCATTTTGAAACTAAAGTGATTGTCAAAATTAATCCAATAATGCACTGCAGCTCA[A/G]TTCACTTATAAGATACATTATCATATAAATAATAATGTTTTTAATTTCTTGCAAACTTAG		no gene	NR2F2							no genes
61	ULGR_BTA-54815	4.2606		0	0	-1.062	0.261	-	-		0.03		-	-	-	-	-	-		3.23191	*	22	53153671	rs=41603523	GCCCGCCCAACCTCTCCCTCTCACCTTCTCCATCTCGGCCTCCGACACAAGCATGACAAT[A/G]ACCGACACTTTCTGCTCATGCACCATGAGCCAGAAGTCGGCCGCTGTGCCAGGCAGGGGG		LOC100849619	C22H3orf75	CSPG5	SMARCC1					SCAP	PTPN23	NGP	LOC100852218
62	ULGR_AAFC03087431_21277	4.25418		0	0	-0.6144	0.1403	-0.2256	0.1815		0.43		-0.1128	0.09075	0.670098	-0.3344	0.08438	4.06754		3.80051	*	24	3187967	no rs	TCCTTCCTTAGTCACACTGGCTGACCTTGGGCTTGGACCAGGTACTGTGGTCCTGATGAG[T/C]GTGGAGACGCTAACAGAAGGACCCCACGCTCACAGTACAGGCAGCCAACTGGGTCTCCGA		no gene	TSHZ1							ZADH2
63	ULGR_BTA-62024	3.51383		0	0	-0.5103	0.1369	-0.02046	0.232		0.37		-0.01023	0.116	0.0360298	-0.3334	0.09197	3.49457		3.167	*	26	11258149	rs=41650576	ATTTATAACTAATGCTCATTATTAAAAATAAGTCAGGTAACATAAGATGCTATATTCTTA[A/C]AGCTTTGTTTTCCTTCACAAGCAGTTGGGTATAGTATAGAAGAACTCTGCCTAAACTCCT		FAS	ACTA2	STAMBPL1						no genes
64	ULGR_BTA-62026	3.51383		0	0	-0.5103	0.1369	-0.02046	0.232		0.37		-0.01023	0.116	0.0360298	-0.3334	0.09197	3.49457		3.167		26	11258304	rs=41650578	ACTCNTGGTGTATCCTAGTTCCAGTGAGTCAGTGATAAGATGGTCATAAACCCTTGGCCT[A/G]CCTTTTATATTTGTGGATCATTGATCATCAGGTCCATGAAGGCATTAGAAATGAGCACTT		FAS	ACTA2	STAMBPL1						no genes
65	ULGR_rs29015676	3.16473		0	0	0.035	0.1398	-0.6896	0.2066		0.39		-0.3448	0.1033	3.04038	0.2532	0.08826	2.36614		3.01945		26	19987933	rs=29015676	ACTTCAAGAATAAAGCATTATTTGAACCTCAGTTCTGCCACTTGCTACTGGGAGGACCTC[A/G]GGCGCATTGTTTTTTTCTCTCTGACTCTCAGTGATCTCAACACCTACCATGGAAATCTCT		no gene	MIR1287	PYROXD2	HPS1					LOXL4
66	ULGR_rs29015675	3.09732		0	0	0.03539	0.14	-0.6779	0.2056		0.39		-0.3389	0.1028	2.97856	0.2495	0.08818	2.31434		2.95875		26	19988119	rs=29015675	CAGCAGCAAGAAGGCAGGTATCTGCAAGCCAGGAAGATAGCCCTCACTAGCAACTGAATC[A/T]GATAAGCACCTTGATCTTGCACTTCCCACCTTCTAGAATTCTGAGAAAGTTTGTGTTGTT		no gene	MIR1287	PYROXD2	HPS1					LOXL4
67	Hapmap32845-BTA-152047	3.2868		0	0	0.3064	0.1517	1.592	0.4369		0.15		0.7959	0.2185	3.52603	-0.3263	0.1634	1.33404		3.38443	*	26	35852599	rs=42316308	ATTATTTGGTCAATTTGGATTTCGCAGACAATTAAACTGGTTAATTCAGATCAAAATTTC[T/C]TCTTCAGATTCTGACTTATCAGGATTGGCACCTACATTAATTTAATTAGTGGACCAATGG		no gene	FAM160B1							LOC530353
68	ULGR_BTA-118023	3.00868		0	0	-0.7066	0.1957	-0.441	0.2156		0.38		-0.2205	0.1078	1.38242	-0.3241	0.0899	3.46054		2.80991	*	27	37171343	rs=41566885	GTACAGACAACAGGGCAGATTAACGCAAAAAGACCTTCTGTAAGACTCATTGTATGAAAT[A/C]GTCAAAAATAAATAATCTGAAATGCAGAAAAAAATGAAGTAACTTACAATGAAACCCCAA		no gene	ADAM18							IDO1	IDO2
	Footnotes
1	Significance of association between SNP and vitamin B-12 content in milk of 487 cows.
2	Genotype effects relative to genotype AA of which the effect was set to zero.
3	Minor allele frequency.
4	Additive SNP effect: half of the contrast between the two homozygous genotypes (AA and BB).
	Dominance SNP effect: contrast between the additive effect and the heterozygous genotype (AB).
5	Significance of additive and dominance SNP effects.
6	The phenotypic variance explained by a SNP is calculated from the estimated genotype effects and observed genotype frequencies.
	The result is expressed as percentage of the phenotypic variance (σ2p = σ2animal + σ2e).
7	The * marks the 23 SNP that were included in the model to estimate the total phenotypic variance explained by the significantly associated SNP together.
8	Bos taurus chromosome.
9	This SNP was located in the cluster of significantly associated SNP on BTA13 in a previous genome build.
